# Supplementary material for: Plausibility of Using a Checklist With YouTube to Facilitate the Discovery of Acute Low Back Pain Self-Management Content: Exploratory Study
Source: PubMed Central journal article supplement (PMC7718094; doi:10.2196/23366), 2020-11-20
Supplement: formative_v4i11e23366_app1.pdf [file formative_v4i11e23366_app1.pdf]

## Appendix 4: Krippendorff's alpha intercoder reliability

Items reviewed. N=104 out of 201 items in final data set.

| Modified Brief Discern - Krippendorff Alpha                                           |       |         |              |         |             |
|---------------------------------------------------------------------------------------|-------|---------|--------------|---------|-------------|
|                                                                                       | Alpha | Coder 1 | Disagreement | Coder 2 | Total items |
| 1. Is it clear what sources of information were used to compile the publication?      | 1     | 104     | 0            | 104     | 208         |
| 5. Is it clear when the information used or reported in the publication was produced? | 1     | 104     | 0            | 104     | 208         |
| 9. Does it describe how each treatment works?                                         | 1     | 104     | 0            | 104     | 208         |
| 10. Does the publication describe the benefits of each treatment?                     | 1     | 104     | 0            | 104     | 208         |
| 11. Does it describe the risks of each treatment?                                     | 1     | 104     | 0            | 104     | 208         |
| 13. Does it describe how the treatment choices affect overall quality of life?        | 1     | 104     | 0            | 104     | 208         |

Items reviewed. N=104 out of 201 items in final data set.

| ALBP Checklist - Krippendorff Alpha |          |         |              |         |             |
|-------------------------------------|----------|---------|--------------|---------|-------------|
|                                     | Alpha    | Coder 1 | Disagreement | Coder 2 | Total items |
| 1. Acute                            | 0.930746 | 101     | 3            | 104     | 208         |
| 2. ADL                              | 0.957721 | 102     | 2            | 104     | 208         |
| 3. Analgesia                        | 0.935252 | 101     | 3            | 104     | 208         |
| 4. Red flag                         | 0.935252 | 101     | 3            | 104     | 208         |
| 5. Affect                           | 0.97734  | 103     | 1            | 104     | 208         |
| 6. Prognosis                        | 1        | 104     | 0            | 104     | 208         |
