# Supplementary material for: Plausibility of Using a Checklist With YouTube to Facilitate the Discovery of Acute Low Back Pain Self-Management Content: Exploratory Study
Source: PubMed Central journal article supplement (PMC7718094; doi:10.2196/23366), 2020-11-20
Supplement: formative_v4i11e23366_app2.pdf [file formative_v4i11e23366_app2.pdf]

## Appendix 5: Google Trends Youtube. Relevant terms.

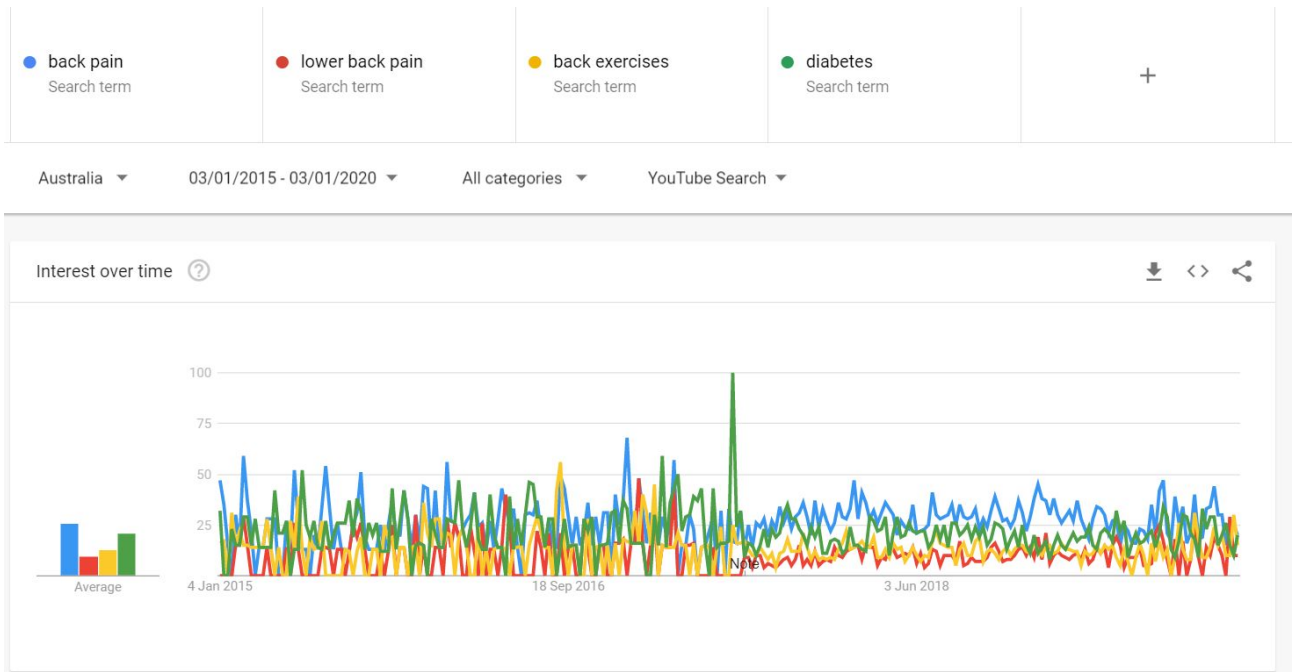

Google Trends YouTube search 2015-2020. United States.

Search terms: back pain, lower back pain, back exercises . Diabetes as comparator

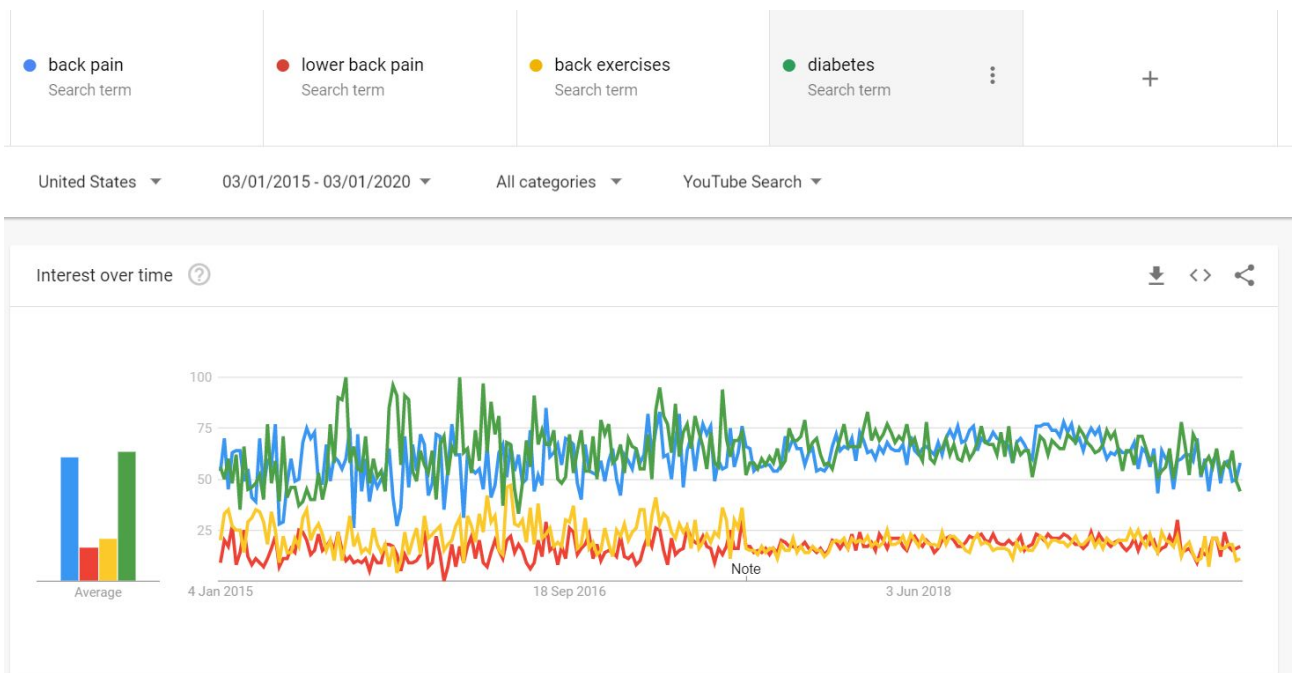

Google Trends YouTube search 2015-2020. Australia.

Search terms: back pain, lower back pain, back exercises . Diabetes as comparator
