# Supplementary material for: Plausibility of Using a Checklist With YouTube to Facilitate the Discovery of Acute Low Back Pain Self-Management Content: Exploratory Study
Source: PubMed Central journal article supplement (PMC7718094; doi:10.2196/23366), 2020-11-20
Supplement: formative_v4i11e23366_app6.pdf [file formative_v4i11e23366_app6.pdf]

## Appendix 2: Modified Brief Discern codebook

| Brief Discern question                                                                                               | Brief Discern codebook                                                                                                                                                                                                                  |
|----------------------------------------------------------------------------------------------------------------------|-----------------------------------------------------------------------------------------------------------------------------------------------------------------------------------------------------------------------------------------|
| 1. Is it clear what sources of information were used to compile the publication (other than the author or producer)? | <b>YES:</b> At least one specific peer reviewed reference mentioned in the video.                                                                                                                                                       |
|                                                                                                                      | <b>NO:</b> No specific peer reviewed reference mentioned in the video.                                                                                                                                                                  |
| 5. Is it clear when the information used or reported in the publication was produced?                                | <b>YES:</b> Specific date of a peer reviewed reference mentioned in the video (not publication date of video itself).                                                                                                                   |
|                                                                                                                      | <b>NO:</b> No specific publication date of a peer reviewed reference mentioned in the video.                                                                                                                                            |
| 9. Does it describe how each treatment works?                                                                        | <b>YES:</b> Description of the treatment should be based on current mainstream biologically plausible theory. Eg biopsychosocial pain theory.                                                                                           |
|                                                                                                                      | <b>NO:</b> Argument for video content founded on arguments incorporating terms such as tension, release, stretch, swelling, adjustment of discs, leg length, and spinal rotation.<br>OR<br><b>No</b> description of how treatment works |
| 10. Does the publication describe the benefits of each treatment?                                                    | <b>YES:</b> At least one benefit for low back pain or disability resulting from the activity described in the video - eg pain, disability, emotional state.<br>No evidence is required.                                                 |
|                                                                                                                      | <b>NO:</b> No benefits for low back pain described                                                                                                                                                                                      |
| 11. Does it describe the risks of each treatment?                                                                    | <b>YES;</b> At least one medical risk of the intervention described in the video content (eg stroke, paralysis etc)<br>This excludes minor temporary local soreness.                                                                    |
|                                                                                                                      | <b>NO:</b> no medical risks of the intervention described in the video.                                                                                                                                                                 |
| 13. Does it describe how the treatment choices affect overall quality of life?                                       | <b>YES;</b> There is at least one broad statement describing the overall effect of treatment - ie not just reduced back pain or disability.                                                                                             |
|                                                                                                                      | <b>NO:</b> No mention of influence of the intervention on the overall quality of life.                                                                                                                                                  |
