# Supplementary material for: Plausibility of Using a Checklist With YouTube to Facilitate the Discovery of Acute Low Back Pain Self-Management Content: Exploratory Study
Source: PubMed Central journal article supplement (PMC7718094; doi:10.2196/23366), 2020-11-20
Supplement: formative_v4i11e23366_app7.pdf [file formative_v4i11e23366_app7.pdf]

## Appendix 3: ALBP Checklist

| ALBP Checklist                                                                  | ALBP codebook - definitions                                                                                                                                                                                                                                                                                                                                                                       |
|---------------------------------------------------------------------------------|---------------------------------------------------------------------------------------------------------------------------------------------------------------------------------------------------------------------------------------------------------------------------------------------------------------------------------------------------------------------------------------------------|
| 1.Acute (Suitable for acute patients)                                           | <p><b>YES:</b> The exercises and advice are of appropriate intensity and scope for early onset low back pain in a middle aged individual of average fitness and flexibility level. Yoga, pilates, and walking are all equally effective for example.</p> <p><b>NO:</b> The exercises and advice are not suitable as described above</p>                                                           |
| 2. ADL (Activities of daily living)<br><br>Lancet:<br>“Advice to remain active” | <p><b>YES:</b> At least ONE mention of:<br/>           Activities of daily living (ADL) during video<br/>           This includes walking, modifying environment, sport and recreation, modifying ADL, maintaining ADL.</p> <p><b>NO:</b> No mention of ADL as described above</p>                                                                                                                |
| 3. Analgesia                                                                    | <p><b>YES:</b> At least one mention of:<br/>           1) Over the counter pharmacological analgesia<br/>           OR<br/>           2) non-pharmacological self-management described in guidelines (for example NSAIDS, heat, ice, pacing, effect of exercises on pain)</p> <p><b>NO:</b> No mentions of pharmacological or non-pharmacological analgesia</p>                                   |
| 4. Reassuring affect                                                            | <p><b>YES:</b> Is the video emotionally reassuring overall?<br/>           This includes: education content, editing, music, encouraging fear or catastrophizing, and/or loud, urgent, or frantic narration.</p> <p><b>NO:</b> Not reassuring overall as per description of reassuring affect as described above.</p>                                                                             |
| 5. Appropriate Prognosis                                                        | <p><b>YES:</b> Author describes:<br/>           1) Plausible prognosis consistent with Lancet non-specific acute low back pain guidelines.<br/>           Not overpromising.</p> <p><b>NO:</b><br/>           1) Overpromising. Terms such as “fix”, “cure” “instant” indicate unrealistic prognosis. Also discouraging imaging..<br/>           OR<br/>           2) No prognosis mentioned.</p> |
| 6. Red flags                                                                    | <p><b>YES:</b> At least one mention of referral to mainstream medical provider for formal advice in video content.<br/>           OR<br/>           Mention of alternative medical diagnosis or symptoms including: cauda equina, renal problems, abdominal aortic aneurysm, cancer, infection</p>                                                                                                |
|                                                                                 | <p><b>NO:</b> No mention of referral to mainstream medical provider for formal advice in video content<br/>           OR<br/>           No mention of medical diagnosis for low back pain</p>                                                                                                                                                                                                     |
