# Supplementary material for: Plausibility of Using a Checklist With YouTube to Facilitate the Discovery of Acute Low Back Pain Self-Management Content: Exploratory Study
Source: PubMed Central journal article supplement (PMC7718094; doi:10.2196/23366), 2020-11-20
Supplement: formative_v4i11e23366_app8.pdf [file formative_v4i11e23366_app8.pdf]

## Appendix 6 Final data set

| <b>Chiropractic videos</b>       |             |              |                |              |
|----------------------------------|-------------|--------------|----------------|--------------|
| Channel name                     | YouTube URL | Discipline   | Length Seconds | Views        |
| Chiro Core                       | T6DQrzMJZE4 | Chiropractic | 721            | 2509409      |
| Dr. Rahim Gonstead Chiropractor  | lTBIjCA_F7E | Chiropractic | 1923           | 12887206     |
| Advanced Chiropractic Relief     | MgobNg4DGQk | Chiropractic | 685            | 89413        |
| Chiro Core                       | 1hEDlRpm1jg | Chiropractic | 323            | 8289676      |
| Chiro Core                       | EhzLv5tlxGY | Chiropractic | 379            | 22234444     |
| Discover Chiropractic            | gz4X01_myVE | Chiropractic | 341            | 3516166      |
| Dr Joseph Cipriano DC            | K43e7seYtZk | Chiropractic | 792            | 2289167      |
| Dr Joseph Cipriano DC            | KKjSS9Ig7_A | Chiropractic | 980            | 3605381      |
| Dr Joseph Cipriano DC            | QzLuTgx5h5I | Chiropractic | 678            | 3175118      |
| Back Intelligence                | vuGnzLxRvZM | Chiropractic | 309            | 168763       |
| DrJason                          | _FuPD0HXxXA | Chiropractic | 230            | 58136352     |
| Dr Joseph Cipriano DC            | iTINA_4nDa0 | Chiropractic | 728            | 2359384      |
| Dr Joseph Cipriano DC            | Jg-0cIXZBoM | Chiropractic | 902            | 17276289     |
| Advanced Chiropractic Relief LLC | dXh_LueAddo | Chiropractic | 498            | 258767       |
| Dr. Kamilla Holst                | q75OrnukwbA | Chiropractic | 284            | 4734194      |
| Dr. Rahim Gonstead Chiropractor  | FrFZ2Yo9QrE | Chiropractic | 559            | 7033459      |
| Dr. Rahim Gonstead Chiropractor  | jWPMVoH1wFU | Chiropractic | 1346           | 4874844      |
| ACTIV CHIROPRACTIC               | CdCClhtKH2Q | Chiropractic | 493            | 1643391      |
| ACTIV CHIROPRACTIC               | PZfyQIoxJIQ | Chiropractic | 336            | 7550         |
| ACTIV CHIROPRACTIC               | GjHMOj3HT8I | Chiropractic | 202            | 410349       |
| ACTIV CHIROPRACTIC               | 8p9TBuIMmIo | Chiropractic | 311            | 200831       |
| Advanced Chiropractic Relief LLC | lho-8MCvvnQ | Chiropractic | 660            | 1569664      |
| Advanced Chiropractic Relief LLC | dA0zGUK4N1U | Chiropractic | 714            | 60736        |
| Advanced Chiropractic Relief LLC | j11NkJSIKdo | Chiropractic | 809            | 5333096      |
| Back Intelligence                | 2a2osZ_1FVs | Chiropractic | 245            | 1436894      |
| ACTIV CHIROPRACTIC               | 6RX3OiwFqP8 | Chiropractic | 179            | 247295       |
| ACTIV CHIROPRACTIC               | t_uR01Dx9Mk | Chiropractic | 190            | 1456610      |
| Back Intelligence                | bGAz_p7nUbY | Chiropractic | 456            | 4528         |
|                                  |             |              | 581.18         | 5,921,749.14 |
|                                  |             |              | Mean length    | Mean views   |
| <b>Fitness videos</b>            |             |              |                |              |
| Channel name                     | YOUTUBE URL | Discipline   | Length Seconds | Views        |
| Stanford                         | mdJStrJ5t9g | Fitness      | 1428           | 24242        |
| Richard Ji                       | _qjBvQ9F4kw | Fitness      | 226            | 1372035      |
| Hanna Öberg                      | 6SYIMgVgm50 | Fitness      | 622            | 325588       |
| Jeremy Ethier                    | 8LJ3Q3Fsrsz | Fitness      | 568            | 4909718      |
| Gravity Transformation           | apWQucmQU5w | Fitness      | 661            | 3534856      |
| SixPackAbs.com                   | b5fmea4D_3Q | Fitness      | 345            | 1382475      |

|                            |             |         |      |         |
|----------------------------|-------------|---------|------|---------|
| Simeon Panda               | E0JNbBccexE | Fitness | 432  | 404138  |
| Mike Thurston              | Eh93DTXfahk | Fitness | 689  | 2810850 |
| Sparta Strength            | F7-cBttLavU | Fitness | 331  | 3128417 |
| Bodybuilding.com           | Fe7pzbZQ0Gs | Fitness | 597  | 1783185 |
| BroScienceLife             | G5GIJmCwchk | Fitness | 379  | 3772361 |
| Anabolic Aliens            | JQeOhQoi3GY | Fitness | 375  | 2946508 |
| Jeremy Ethier              | kBWAon7ItDw | Fitness | 571  | 1178794 |
| itzDeaMan                  | KSZogPDS9c0 | Fitness | 207  | 2123310 |
| Bodybuilding.com           | lA7dbOmxs5I | Fitness | 507  | 7017928 |
| Bodybuilding.com           | mcCg_ycMh1A | Fitness | 262  | 5181805 |
| Simeon Panda               | NoRkALo4AMQ | Fitness | 466  | 3387144 |
| CHRIS HERIA                | qqEw8XH-feI | Fitness | 616  | 388118  |
| Love Sweat Fitness         | qqHJLTi2yX4 | Fitness | 403  | 1576818 |
| GYM BODY MOTIVATION        | s8taXR3mYa8 | Fitness | 274  | 1475965 |
| musclemonsters             | StbBFiyNimA | Fitness | 569  | 263247  |
| UlissesWorld               | T60YhWfv9no | Fitness | 622  | 174640  |
| Krissy Cela                | twjhKJtHwfg | Fitness | 530  | 975218  |
| V Shred                    | upYjtQEbjAI | Fitness | 838  | 214044  |
| WORKOUT                    | vNzxQN-1kDI | Fitness | 516  | 827729  |
| ePainAssist                | WFktLpyDprM | Fitness | 219  | 2194951 |
| AlphaShred TV              | xrsDAn7RJ8U | Fitness | 340  | 549232  |
| Health And Fitness         | Xvddna84BXo | Fitness | 774  | 2252317 |
| Christina Carlyle          | y70jB93squQ | Fitness | 512  | 2773682 |
| PROMiXX                    | YpNu9vNePSo | Fitness | 184  | 553445  |
| Mike O'Hearn               | yXVouZ84Mvg | Fitness | 216  | 2233315 |
| Beauty recipes             | z8LOO9_OdZE | Fitness | 216  | 2233372 |
| Gabriella Whited           | EwfY0gz9a1I | Fitness | 399  | 6812080 |
| Roberta's Gym              | doy7c0eumus | Fitness | 677  | 4375129 |
| BRIGHT SIDE                | DXBAq5taLs0 | Fitness | 1058 | 2604871 |
| Redefining Strength        | E5w3nZpvdI0 | Fitness | 603  | 6646    |
| Posture Makeover           | 0OkB0xO_9kU | Fitness | 807  | 3857338 |
| Sharp HealthCare           | 5nZ8n1vUqVU | Fitness | 60   | 916252  |
| FitnessBlender             | YMwi_eDYG9U | Fitness | 1517 | 1219229 |
| FitnessBlender             | CbZzeO4P9YA | Fitness | 537  | 2401939 |
| Memorial Healthcare System | q-FlsD3fubA | Fitness | 129  | 430560  |
| Kai Simon                  | dl474z1bhmk | Fitness | 299  | 1934607 |
| Howcast                    | MnWWDAsEfXk | Fitness | 172  | 1859565 |
| Calisthenicmovement        | qAubcPOQw3s | Fitness | 305  | 2656641 |
| FitnessBlender             | ahPse5W9Eyo | Fitness | 1074 | 1934513 |
| FitnessBlender             | p1GERX3lf3Y | Fitness | 481  | 2726271 |
| Jeremy Ethier              | 2tnATDflg4o | Fitness | 596  | 1430078 |
| Living Better              | pnn-uOtO6aI | Fitness | 251  | 285513  |

|                              |              |               |                |              |
|------------------------------|--------------|---------------|----------------|--------------|
| FitnessFAQs                  | ZIY9Y_nQ2V8  | Fitness       | 317            | 1686373      |
| HASfit                       | b4ZnvU3QkRM  | Fitness       | 1650           | 1314688      |
| BRIGHT SIDE                  | g-sen-A0rtg  | Fitness       | 431            | 2563955      |
| Matty Fusaro                 | HoNW3TnAT3Y  | Fitness       | 369            | 2974439      |
| HASfit                       | p6CMso14NWk  | Fitness       | 1247           | 4866508      |
| BlackBeltSecrets             | 7R3GDSHS_y8  | Fitness       | 281            | 3917171      |
| HASfit                       | _IT5Cd4cDTc  | Fitness       | 1990           | 24125        |
|                              |              |               | 559            | 2123053.418  |
|                              |              |               | Mean length    | Mean views   |
| <b>Medical videos</b>        |              |               |                |              |
| Channel name                 | YOUTUBE URL  | Discipline    | Length Seconds | Views        |
| BMI Healthcare               | 4HwtjtR3b_M  | Medical       | 205            | 79541        |
| nabil ebraheim               | zfWKcTixM6E  | Medical       | 363            | 2190472      |
| Nucleus Medical Media        | nV4ILsaV SXc | Medical       | 250            | 2009304      |
| nabil ebraheim               | AWR1M90NG5s  | Medical       | 363            | 2889806      |
| UCLA Health                  | vRS0je8eopc  | Medical       | 53             | 220824       |
| DoctorOz                     | -MI dGP4i1bA | Medical       | 313            | 2251415      |
| UW Medicine                  | n_E76I25_Vg  | Medical       | 140            | 476409       |
| Dartmouth-Hitchcock          | nizukO1o2AU  | Medical       | 137            | 283221       |
| UC San Diego Health          | 20zybMbnVoU  | Medical       | 321            | 4863685      |
| Quebec Pain Research Network | DkRnZNA nWfE | Medical       | 365            | 2001520      |
| Coordinated Health           | Lk8eIJCLpQg  | Medical       | 493            | 4155470      |
| UPMC                         | UANvh8QynLI  | Medical       | 176            | 1005938      |
| Carilion Clinic              | 7LPUUqJxDyE  | Medical       | 265            | 4806392      |
| OHSU                         | sy41zRU Yp48 | Medical       | 156            | 14261        |
| Coordinated Health           | WGY6GDJUBPY  | Medical       | 493            | 792615       |
| Duke Health                  | 1HXrLxAVfOg  | Medical       | 349            | 4286439      |
| Carilion Clinic              | 2aNcuZbm7N0  | Medical       | 265            | 4806392      |
| Top Doctors UK               | 7Vyiynzv48   | Medical       | 319            | 587114       |
| DocMikeEvans                 | BOjTegn9RuY  | Medical       | 666            | 16887686     |
|                              |              |               | 299.58         | 2,874,131.79 |
|                              |              |               | Mean length    | Mean views   |
| <b>Physiotherapy videos</b>  |              |               |                |              |
| Channel name                 | YOUTUBE URL  | Discipline    | Length Seconds | Views        |
| ATHLEAN-X™                   | a9_JPgW9nw   | Physiotherapy | 700            | 2305800      |
| ATHLEAN-X™                   | eE7dzM0iexc  | Physiotherapy | 636            | 3675787      |
| ATHLEAN-X™                   | gIhCuqtC0r0  | Physiotherapy | 508            | 3697398      |
| ATHLEAN-X™                   | mjnseqLiVXM  | Physiotherapy | 266            | 3607231      |
| ATHLEAN-X™                   | NhlVYy1wkKQ  | Physiotherapy | 444            | 1960804      |
| ATHLEAN-X™                   | nK3BNozPEx4  | Physiotherapy | 418            | 2806115      |
| ATHLEAN-X™                   | oLwTC-IAJws  | Physiotherapy | 841            | 7114831      |
| ATHLEAN-X™                   | OXvQe9payHw  | Physiotherapy | 670            | 6271510      |

|                                     |             |               |      |          |
|-------------------------------------|-------------|---------------|------|----------|
| ATHLEAN-X™                          | TXh1oLXb6zk | Physiotherapy | 398  | 1718744  |
| ATHLEAN-X™                          | ydT74SAts7M | Physiotherapy | 346  | 1716731  |
| Bob & Brad                          | fBpYx1XsMqg | Physiotherapy | 719  | 3678294  |
| Bob & Brad                          | jogQL7TxXTA | Physiotherapy | 730  | 1306446  |
| Madden PT                           | sDenSUIGuek | Physiotherapy | 176  | 2208299  |
| KT Tape                             | tPWau00bAYE | Physiotherapy | 148  | 198266   |
| AskDoctorJo                         | lCxDDAWi2Q  | Physiotherapy | 356  | 260119   |
| Michelle Kenway                     | QB93HgZJiio | Physiotherapy | 255  | 129635   |
| Michelle Kenway                     | TGI5TFnY8Ck | Physiotherapy | 283  | 960316   |
| Michelle Kenway                     | u_YaHaTg5aE | Physiotherapy | 391  | 1679358  |
| AskDoctorJo                         | UYMmtEFhuxA | Physiotherapy | 719  | 95026    |
| AskDoctorJo                         | wgPf9lJiW5s | Physiotherapy | 281  | 126901   |
| AskDoctorJo                         | WRRFUP_pkII | Physiotherapy | 369  | 10942    |
| ATHLEAN-X™                          | DWmGArQBtFI | Physiotherapy | 563  | 16924450 |
| ATHLEAN-X™                          | IZcOAQoE81A | Physiotherapy | 403  | 12352    |
| AskDoctorJo                         | cRfadxPIVNs | Physiotherapy | 456  | 126867   |
| Bob & Brad                          | 6HOvGr6Tqa8 | Physiotherapy | 653  | 2099028  |
| Madden PT                           | htgyPKNHUs  | Physiotherapy | 260  | 4216315  |
| AskDoctorJo                         | hzv6NvPW33Q | Physiotherapy | 633  | 76540    |
| ChoosePT                            | iVyVnbEst1s | Physiotherapy | 165  | 64614    |
| AskDoctorJo                         | Jn8nYOM6dug | Physiotherapy | 269  | 9961     |
| Physio Fitness                      | hjpgXzVIAiU | Physiotherapy | 665  | 38172    |
| AskDoctorJo                         | 4aR-v_5f-T4 | Physiotherapy | 429  | 113550   |
| AskDoctorJo                         | BoMiM_mnr1Y | Physiotherapy | 315  | 2008087  |
| AskDoctorJo                         | bTn89EBKJdM | Physiotherapy | 179  | 71880    |
| Active Rehabilitation Physiotherapy | i_ohtG0DKrw | Physiotherapy | 237  | 124075   |
| Michelle Kenway                     | tDbvVITtpFU | Physiotherapy | 283  | 408915   |
| AskDoctorJo                         | wrrOCg6V-qU | Physiotherapy | 544  | 346507   |
| AskDoctorJo                         | Xm8iSSdU3I0 | Physiotherapy | 447  | 1468091  |
| AskDoctorJo                         | ykeLv6yEvNs | Physiotherapy | 315  | 2008087  |
| Michelle Kenway                     | TVosLzpgT64 | Physiotherapy | 239  | 561052   |
| AskDoctorJo                         | bEDH_uTcdf4 | Physiotherapy | 499  | 396597   |
| AskDoctorJo                         | qFaarJsrJFQ | Physiotherapy | 490  | 11744    |
| Sharp HealthCare                    | HqwXzi8xpXE | Physiotherapy | 187  | 752128   |
| Ask Dr Jo                           | n6Etl3x9AnU | Physiotherapy | 544  | 338246   |
| AskDoctorJo                         | 750nkDg9XPI | Physiotherapy | 450  | 136362   |
| AskDoctorJo                         | 8oPHrX_oAlk | Physiotherapy | 246  | 2488737  |
| Bob & Brad                          | clfpWjqVP6U | Physiotherapy | 465  | 1836199  |
| Physiotutors                        | QVBxB59Y4Y4 | Physiotherapy | 276  | 18127    |
| Bob & Brad                          | 8MyjVqDxfSc | Physiotherapy | 340  | 4349871  |
| AskDoctorJo                         | S3xXurLpfDk | Physiotherapy | 1162 | 498733   |
| ATHLEAN-X™                          | bOJu7xi3l3Q | Physiotherapy | 582  | 2756896  |

|                                  |              |               |                |              |
|----------------------------------|--------------|---------------|----------------|--------------|
| CHI Health                       | 0_4mojKLL3U  | Physiotherapy | 81             | 11558        |
| Bob & Brad                       | 1RBO6FZBK14  | Physiotherapy | 721            | 13903        |
| AskDoctorJo                      | 9S2SPTfh8NE  | Physiotherapy | 471            | 16718        |
| ATHLEAN-X™                       | 9SKuFe2SERs  | Physiotherapy | 531            | 5258843      |
| AskDoctorJo                      | 2VuLBYrgG94  | Physiotherapy | 328            | 1315777      |
| Duke Health                      | imM1CdW41A8  | Physiotherapy | 173            | 598971       |
| Michelle Kenway                  | 9j0wTLcElUg  | Physiotherapy | 283            | 405483       |
| Michelle Kenway                  | fVEd8M_ZSdQ  | Physiotherapy | 191            | 23349        |
| Lee Health                       | 0mXJ7Up7kcs  | Physiotherapy | 104            | 300024       |
| Tone and Tighten                 | -Qxmc4E7IwA  | Physiotherapy | 735            | 2280032      |
| Children's Hospital Colorado     | bug-Eg27s2I  | Physiotherapy | 146            | 203655       |
| TEDx Talks                       | ErmOTERAnQo  | Physiotherapy | 874            | 34578        |
| SingHealth                       | zLCae7TQx_4  | Physiotherapy | 253            | 327435       |
| The McKenzie Institute, USA      | gsUE0CEz6g0  | Physiotherapy | 2608           | 127848       |
| Ohio State Wexner Medical Center | 9dNfZYfbVq4  | Physiotherapy | 105            | 9625         |
| AskDoctorJo                      | 2yCzNbWQTjo  | Physiotherapy | 610            | 55656        |
|                                  |              |               | 457.03         | 1,526,881.68 |
|                                  |              |               | Mean length    | Mean views   |
| <b>Yoga videos</b>               |              |               |                |              |
| Channel name                     | YOUTUBE URL  | Discipline    | Length Seconds | Views        |
| Yoga With Adriene                | d6zJkHcjbWc  | Yoga          | 723            | 1800366      |
| PsycheTruth                      | 9f1Y4OV3QIA  | Yoga          | 843            | 5,234,392    |
| PsycheTruth                      | Ub8afedu5GQ  | Yoga          | 1427           | 3242287      |
| Natasha Noel                     | ImHDTDhxSpE  | Yoga          | 782            | 8847370      |
| PsycheTruth                      | HpFCxqYwwJc  | Yoga          | 1149           | 3131943      |
| Yoga With Adriene                | Ho9em79_0qg  | Yoga          | 1400           | 4224230      |
| Yoga With Adriene                | phuS5VLQy8c  | Yoga          | 1874           | 6658817      |
| Yoga With Adriene                | XeXz8fIZDCE  | Yoga          | 947            | 4863736      |
| PsycheTruth                      | CO3racII Tcg | Yoga          | 1845           | 7680423      |
| PsycheTruth                      | Q00u-60XM9Y  | Yoga          | 2441           | 4319510      |
| YOGATX                           | pyFNz8zJSdw  | Yoga          | 1971           | 3039986      |
|                                  |              |               | 1,400.18       | 4,822,096.36 |
|                                  |              |               | Mean length    | Mean views   |
| <b>Other videos</b>              |              |               |                |              |
| Channel name                     | YOUTUBE URL  | Discipline    | Length Seconds | Views        |
| Lex Fitness                      | edZaTzJ1fI0  | Other         | 854            | 1933962      |
| Traditional Massage Official     | kjMKXY0pMy0  | Other         | 654            | 32688519     |
| John Gibbons                     | O86oNfz8Peg  | Other         | 126            | 347710       |
| John Gibbons                     | wAxw3P61_1w  | Other         | 153            | 572751       |
| John Gibbons                     | y8poqChYAes  | Other         | 172            | 2763851      |
| John Gibbons                     | ZLXYVHpSYgM  | Other         | 157            | 415767       |
| MassageASMR                      | tsjIGmLtz_I  | Other         | 1444           | 7497487      |

|                              |             |       |             |              |
|------------------------------|-------------|-------|-------------|--------------|
| Thai Massage Services        | _aFYOB8sj4Q | Other | 683         | 30067303     |
| MassageASMR                  | tsjIGmLtz_I | Other | 1444        | 7484521      |
| MassageASMR                  | zNCVrO6nlR8 | Other | 1836        | 4386842      |
| ePainAssist                  | UogxbusNOVo | Other | 146         | 2827782      |
| Melbourne Muscular Therapies | blZsRh6_guo | Other | 350         | 10420920     |
| DJO ANZ                      | WwqAjrYGfq0 | Other | 237         | 9486         |
| John Gibbons                 | BXHr7l4l4_Y | Other | 191         | 9394         |
| Vitality Massage             | bxOBt3XKsoA | Other | 840         | 1445999      |
| BRIGHT SIDE                  | QDFFKOtuHh0 | Other | 943         | 2661822      |
| BRIGHT SIDE                  | x_WJ5cotyfE | Other | 785         | 7005327      |
| Carrington College           | zNZ0JLHGxAY | Other | 427         | 1435990      |
| Intermountain Healthcare     | V7tWWdbOYtQ | Other | 277         | 790617       |
| Thai Massage Services        | UqTgp_3h8As | Other | 2112        | 22443610     |
| Thai Massage Services        | nyszokVMha0 | Other | 1558        | 6502940      |
| AbrahamThePharmacist         | lYq_yehKReo | Other | 272         | 109215       |
| Info Tech                    | WpjJECNiBxs | Other | 417         | 4890830      |
|                              |             |       | 699.04      | 6,465,767.17 |
|                              |             |       | Mean length | Mean views   |
