# Supplementary material for: Plausibility of Using a Checklist With YouTube to Facilitate the Discovery of Acute Low Back Pain Self-Management Content: Exploratory Study
Source: PubMed Central journal article supplement (PMC7718094; doi:10.2196/23366), 2020-11-20
Supplement: formative_v4i11e23366_app9.pdf [file formative_v4i11e23366_app9.pdf]

## Appendix 7 Most viewed video in final data set.

| Most viewed video in data set |                                                                                                       |
|-------------------------------|-------------------------------------------------------------------------------------------------------|
| Title:                        | DR. JASON-YEARS Of Back PAIN Helped With CHIROPRACTIC Care                                            |
| URL:                          | <a href="https://www.YouTube.com/watch?v=_FuPD0HXxXA">https://www.YouTube.com/watch?v=_FuPD0HXxXA</a> |
| Discipline:                   | Chiropractic                                                                                          |
| Length (seconds)              | 229                                                                                                   |
| Views (as at March 2020)      | 58136352                                                                                              |
